### Usefulness of strain imaging to determine prognosis in pulmonary hypertension

V. Monivas Palomero, P. Remior, D. Garcia-Rodriguez, S. Garcia-Gomez, E. Garcia-Izquierdo, A. Borrego, S. Navarro, A. Martinez Mingo, C. Arellano-Serrano, J.F. Oteo, A. Garcia-Touchard, J.F. Goicolea, F. Hernandez Perez, S. Mingo

University Hospital Puerta de Hierro Majadahonda, Department of Cardiology, Madrid, Spain

Funding Acknowledgement: Type of funding source: None

**Introduction:** Pulmonary hypertension (PH) is defined as mean pulmonary arterial pressure (mPAP)  $\geq 25$  mmHg at rest, measured by right heart catheterization (RHC).

**Purpose:** To describe classical and myocardial deformation echocardiographic parameters in patients with established PH and to identify prognostic variables

**Methods:** We prospectively enrolled 76 patients with mPAP  $\geq 25$  mmHg undergoing RHC between 2017 and 2018. All subjects underwent transthoracic echocardiography (TTE) according to the latest ASE/EACVI guidelines the same day of the RHC. Strain analysis was carried out by speckle-tracking echocardiography (QLAB 10.7, Philips). Clinical events during the follow-up were: acute heart failure hospitalization, cardiac transplant and all-cause mortality.

**Results:** Mean age was  $59 \pm 12$ , 43.4% were women and 49 patients

(64.5%) belonged to group 2 of PH. The median follow-up was 288 (ICR 92–534) days. Total number of events was 42 (55.3%, 9 deaths). Variables associated to events are shown in Table 1. All classic LV and RV systolic function and strain parameters were associated with a worse prognosis, being free-wall RV longitudinal strain (RVLS) the only one that remained as a prognostic factor in multivariate analysis. Other variables associated with a worse prognosis were PCP  $> 15$  mmHg and NT-proBNP  $> 1800$ , the latter being independent predictor of events. The attached figure shows event-free survival curves for the global population divided according to whether or not they belong to group II PH.

**Conclusions:** Our data highlight the prognostic value of free-wall RVLS and NT-proBNP in patients with established PH. NT-ProBNP was only useful in group II PH while free-wall RVLS identified patients with a higher risk of events in both groups, mainly in patients with heart disease

Variables associated with events

| Variables             | OR            | P     |
|-----------------------|---------------|-------|
| Univariate analysis   |               |       |
| NTproBNP > 1800       | 3.5 (1.7–7.4) | 0.001 |
| LVEF < 40%            | 2.4 (1.3–4.4) | 0.006 |
| LV GLS < 13           | 2.8 (1.5–5.4) | 0.002 |
| Free-wall RVLS < 13.5 | 2.8 (1.4–5.6) | 0.004 |
| PCWP > 15             | 2.7 (1.3–5.6) | 0.006 |
| TAPSE < 15.5          | 2 (1.1–3.8)   | 0.030 |
| Multivariate analysis |               |       |
| Free-wall RVLS < 13.5 | 2.9 (1.4–5.9) | 0.003 |
| NTproBNP > 1800       | 4 (1.8–9.1)   | 0.00  |

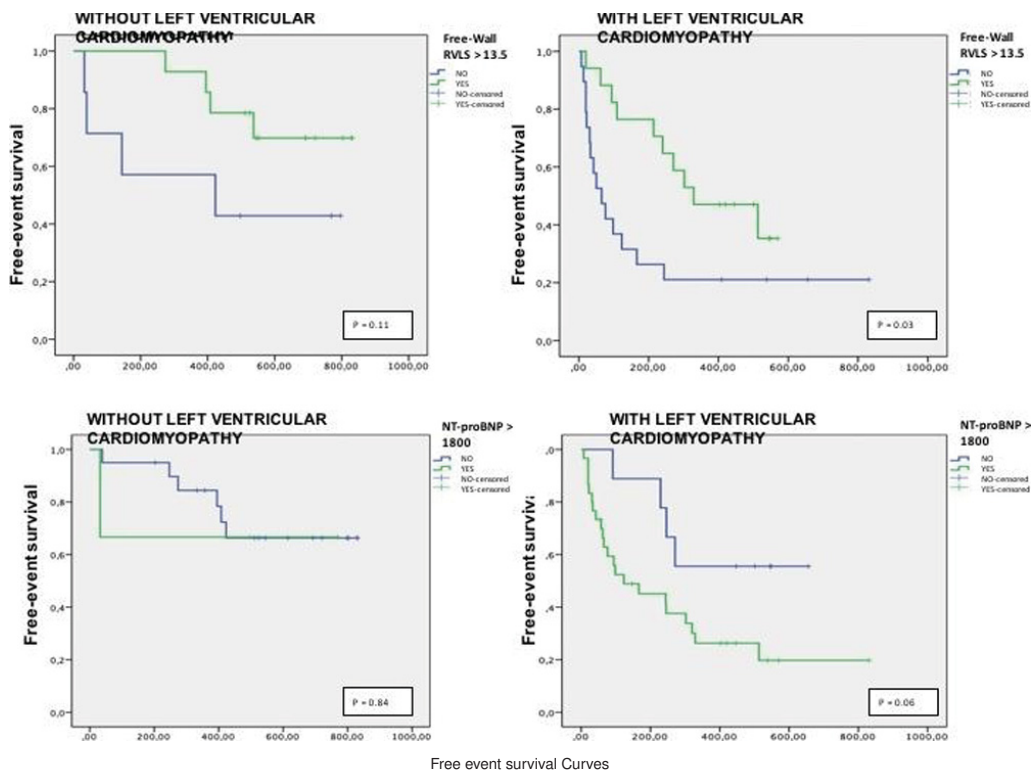

Downloaded from https://academic.oup.com/eurheartj/article/41/Supplement\_2/ehaa946.014/1/6003629 by guest on 24 April 2024
